# Supplementary material
Source: MDPI journal article supplement (https://www.mdpi.com/search?q=atoms-06-00067)
Supplement: s001 [file atoms-06-00067-s001.dat]

z N(z)			M(z)
-5	2.6483938086983883e-6	0.000027598770792764883
-4.9	3.3609798112117957e-6	0.00003435148146147846
-4.8	4.266059619295095e-6	0.00004274760013884327
-4.7	5.415873119786795e-6	0.00005318444210067573
-4.6	6.876919236265168e-6	0.00006615461824959534
-4.5	8.733868443678741e-6	0.00008226860359266303
-4.4	0.000011094568532512024	0.00010228267178760374
-4.3	0.000014096410554036414	0.00012713317383309788
-4.2	0.000017914552651687632	0.00015797916055012646
-4.1	0.000022772281471787364	0.0001962542160096928
-4	0.000028954426803268418	0.00024373088055845032
-3.9	0.00003682448348187449	0.00030259949133844467
-3.8	0.000046846455111418744	0.0003755650188852953
-3.7	0.00005961301481056696	0.0004659654539292769
-3.6	0.00007588149311582633	0.0005779177466370234
-3.5	0.00009662018156594657	0.0007164954862478116
-3.4	0.0001230677808040792	0.0008879458228381045
-3.3	0.00015680973662022838	0.001099954738791221
-3.2	0.00019987696208583868	0.0013619697392639957
-3.1	0.00025487219933373377	0.001685590148651694
-3	0.0003251340069884023	0.0020850439183984436
-2.9	0.00041494785941964063	0.0025777570100722993
-2.8	0.0005298195654735936	0.0031850515436676677
-2.7	0.0006768290857104721	0.003932970137532105
-2.6	0.0008650899524427085	0.004853268128032048
-2.5	0.0011063461967428631	0.005984603754589165
-2.4	0.0014157475134107809	0.00737392557629141
-2.3	0.0018128682801415528	0.009078136444478437
-2.2	0.002323028709176905	0.011165996862944127
-2.1	0.0029790369212970985	0.013720351431027025
-2	0.003823477538233219	0.016840655122084068
-1.9	0.0049117372613906715	0.02064580637372585
-1.8	0.006316005654681447	0.02527722009740517
-1.7	0.008130611648578428	0.030902128271080045
-1.6	0.01047916262973606	0.03771679885720326
-1.5	0.013524156103733056	0.0459495119299834
-1.4	0.017480028500322743	0.05586266907271287
-1.3	0.022630946001716157	0.06775323812188808
-1.2	0.029355536654636038	0.08195038502706839
-1.1	0.038161268176227434	0.09880785577332678
-1	0.04973347402757377	0.11868825294313837
-0.9	0.06500618066957903	0.14193384871881767
-0.8	0.08526709354946459	0.16881559244870037
-0.7	0.11231788364741427	0.19944669182371597
-0.6	0.14872936765748923	0.2336378051702231
-0.5	0.1982682475216798	0.270651257046958
-0.4	0.2666705738413634	0.3087777390439076
-0.3	0.36319557463551627	0.3445645819576618
-0.2	0.504335046759889	0.3712839834489231
-0.1	0.7258272962519825	0.37529384833471907
0	1.1969965764935746	0.3215548909272688
0.1	1.6491786221027265	0.13905559813186308
0.2	1.8162703280629808	-0.08313981925196168
0.3	1.873136319452353	-0.2953462539173153
0.4	1.8620730170057707	-0.47390804048293445
0.5	1.806277942233116	-0.6068090053119901
0.6	1.7213586147639224	-0.6895875630200603
0.7	1.6187420445749774	-0.7230811980516977
0.8	1.5070668172448243	-0.7118115819768702
0.9	1.392886049151031	-0.6627006433704421
1	1.281085332088234	-0.5840122001687215
1.1	1.1751900767658843	-0.48450309607118447
1.2	1.0775909689380825	-0.3727376862890973
1.3	0.9897521972819852	-0.25658996234861586
1.4	0.9123840549538043	-0.1428870974417349
1.5	0.8456006525324606	-0.0371978154364907
1.6	0.7890608281007325	0.05626364067267997
1.7	0.7420915100332767	0.13463362709100868
1.8	0.7037943832693773	0.19631658440681732
1.9	0.6731371352371902	0.24084772204678262
2	0.6490274735265559	0.26872265001178786
2.1	0.630373637463471	0.28119820114787886
2.2	0.6161294893360537	0.28009618860080154
2.3	0.6053286518557138	0.2676084926109239
2.4	0.5971062029922861	0.24612109838473506
2.5	0.5907116503362203	0.21805755297073182
2.6	0.585514035765671	0.18575424122683915
2.7	0.5810008719741871	0.15135137990858039
2.8	0.5767713362479254	0.11673263371128018
2.9	0.5725275499927024	0.08346692206523865
3	0.5680624551496553	0.052792254356604174
3.1	0.563246733485822	0.025614060275851447
3.2	0.5580156195374905	0.0025202166815254667
3.3	0.5523555008590858	-0.016195311410293733
3.4	0.5462914753971367	-0.030485965181850982
3.5	0.5398765040727085	-0.04051802916362224
3.6	0.5331816268361452	-0.0466248806555174
3.7	0.5262870294996619	-0.04925638971434099
3.8	0.519275875597943	-0.04893984718110733
3.9	0.5122288826793588	-0.04624222204873707
4	0.5052201747639542	-0.041735332743885856
4.1	0.49831473000990334	-0.0359671971828992
4.2	0.49156699819950606	-0.02944420897588973
4.3	0.4850199436141082	-0.022613249822468706
4.4	0.4787053640757953	-0.0158530966554844
4.5	0.47264420998908474	-0.009464956737451402
4.6	0.4668476478132374	-0.003680443702882119
4.7	0.4613186552707227	0.001342197768413822
4.8	0.4560529784722986	0.005508020868550734
4.9	0.451040939819939	0.008782260687697718
5	0.4462686078263759	0.011175498775344295
5.1	0.44171928597633375	0.012737133420315683
5.2	0.4373742571571469	0.013548637236322048
5.3	0.43321480425614994	0.013707477460624062
5.4	0.4292216784245219	0.013325733440031406
5.5	0.4253770133274457	0.012517707178481441
5.6	0.4216638997551838	0.01139629689645938
5.7	0.41806723640092625	0.010067669034728333
5.8	0.4145735171663294	0.008628397513808395
5.9	0.4111714692449014	0.007160901437766487
6	0.40785141503861616	0.005735093476298303
6.1	0.404605591199607	0.0044035091615435284
6.2	0.4014278295884725	0.0032055182384391756
6.3	0.3983132382325843	0.0021685370231518952
6.4	0.3952582013260866	0.001306326847378525
6.5	0.39226037922989604	0.0006204829195866068
6.6	0.38931785769385374	0.00010753832004217756
6.7	0.38642946689841806	-0.0002455132176115704
6.8	0.38359446241297174	-0.0004551661489125003
6.9	0.38081231250135944	-0.0005422751658699099
7	0.37808291081635	-0.0005272695715672349
7.1	0.37540572562178826	-0.0004338967027015528
7.2	0.37278054422321205	-0.00028373441245266307
7.3	0.3702069412316973	-0.00009459586202220649
7.4	0.3676842785638575	0.00011425946504495244
7.5	0.36521202448353746	0.0003272836035699278
7.6	0.3627891155184267	0.0005342459499244612
7.7	0.36041480723790764	0.0007228846683684509
7.8	0.3580877171279768	0.0008894031627533217
7.9	0.3558068880635546	0.0010261337977199858
8	0.35357072483617513	0.001134086871963813
8.1	0.35137816397352795	0.0012106037047079354
8.2	0.3492276102671473	0.001256747768261679
8.3	0.3471176812030294	0.0012767091435299527
8.4	0.3450469942671705	0.00127310397239766
8.5	0.3430140605983359	0.001250005353813144
8.6	0.34101781672421516	0.001209487058780212
8.7	0.33905666743634216	0.001157610879472859
8.8	0.33712965560963765	0.0010975885022652676
8.9	0.3352353987300979	0.0010325465357530206
9	0.3333729396726434	0.0009655265107424427
9.1	0.33154121496496364	0.0008998570955665031
9.2	0.32973937382921015	0.0008352086138083692
9.3	0.3279664591403033	0.0007757711463725059
9.4	0.3262215137731639	0.0007229272072613036
9.5	0.3245040059916365	0.000675464438041562
9.6	0.32281308501787265	0.0006333190303746683
9.7	0.3211480064212549	0.0005989263358521235
9.8	0.3195082384656282	0.0005708081279611754
9.9	0.317893036720375	0.0005476776052066867
10	0.31630197579657116	0.0005285457383403802
